# Supplementary material for: Short- and long-term warming effects of methane may affect the cost-effectiveness of mitigation policies and benefits of low-meat diets
Source: PubMed Central journal article supplement (PMC7612339; doi:10.1038/s43016-021-00385-8), 2021-12-13
Supplement: EMS141014-supplement-S1.pdf [file EMS141014-supplement-S1.pdf]

---

**Supplementary information**

---

**Short- and long-term warming effects of methane may affect the cost-effectiveness of mitigation policies and benefits of low-meat diets**

---

In the format provided by the authors and unedited

1 Short- and long-term warming effects of methane may affect the  
 2 cost effectiveness of mitigation policies and benefits of low meat  
 3 diets

4 **Supplementary Information**

5

6 **Additional supporting Figures**

7 *Figure S1: Methane and nitrous oxide emissions for the baseline and 500 \$/t carbon price scenarios. World totals by*  
 8 *year and model; (a) annual Mt CH<sub>4</sub>; (b) annual Mt N<sub>2</sub>O; (c) added warming for CH<sub>4</sub> emissions ( °C); and (d) added warming*  
 9 *for total non-CO<sub>2</sub> emissions ( °C).*

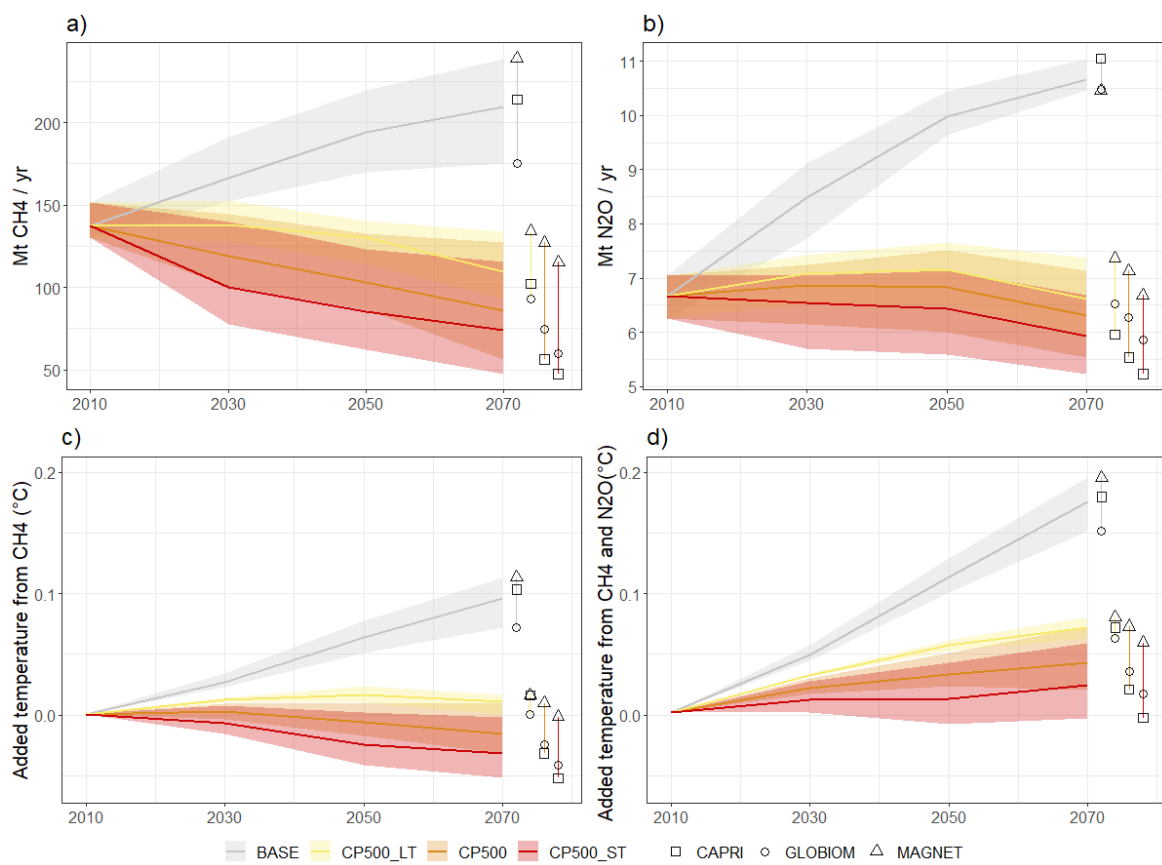

10

11 Note: The shading is the range (distribution across models for respective scenario) compared to the average (thick  
 12 middle line)

13

14 **Figure S2: Methane and nitrous oxide emissions for the baseline and short-term carbon price scenarios including dietary**  
 15 **shifts. World totals by year and model; (a) Annual Mt CH<sub>4</sub>; (b) Annual Mt N<sub>2</sub>O; (c) added warming for CH<sub>4</sub> emissions (°C);**  
 16 **and (d) added warming for total non-CO<sub>2</sub> emissions (°C).**

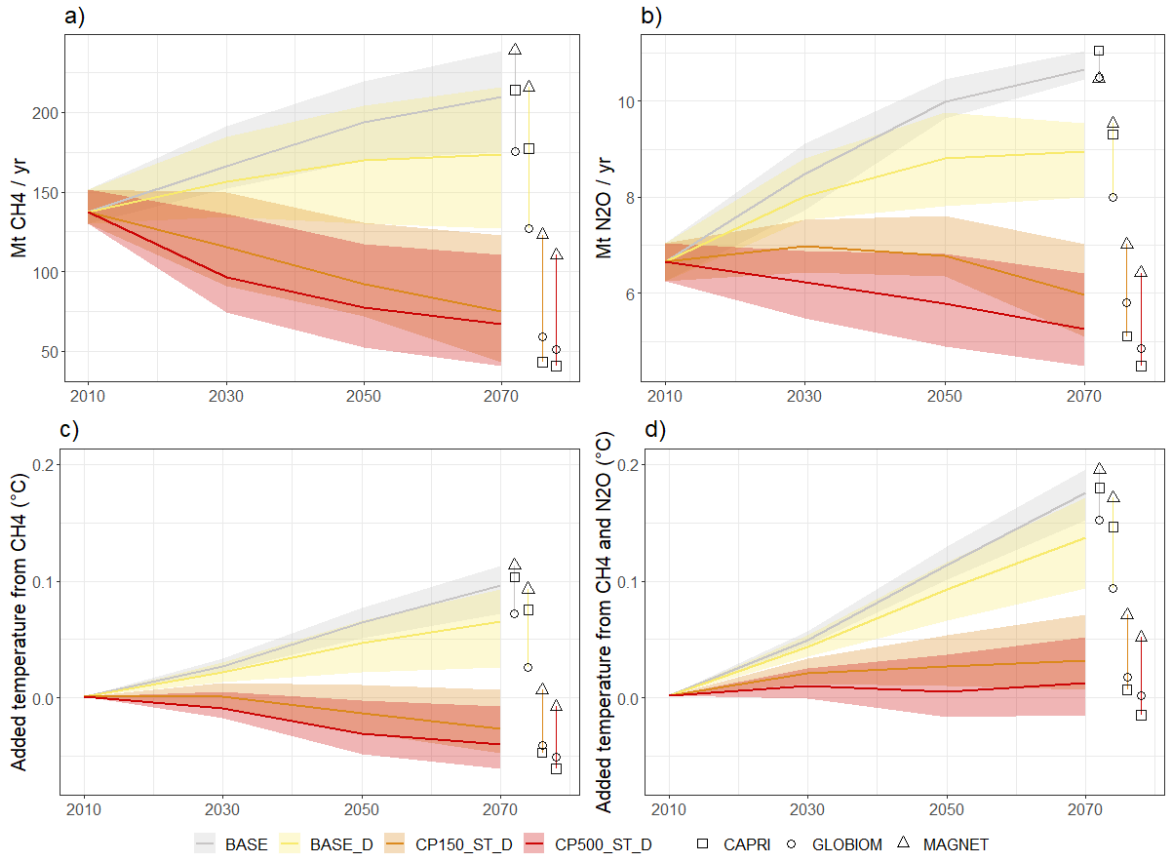

17

18 Note: The shading is the range (distribution across models for respective scenario) compared to the average (thick  
 19 middle line)

20

21 **Figure S3: Methane and nitrous oxide emissions for the baseline and long-term carbon price scenarios including dietary**  
 22 **shifts. World totals by year and model; (a) Annual Mt CH<sub>4</sub>; (b) Annual Mt N<sub>2</sub>O; (c) added warming for CH<sub>4</sub> emissions (°C);**  
 23 **and (d) added warming for total non-CO<sub>2</sub> emissions (°C).**

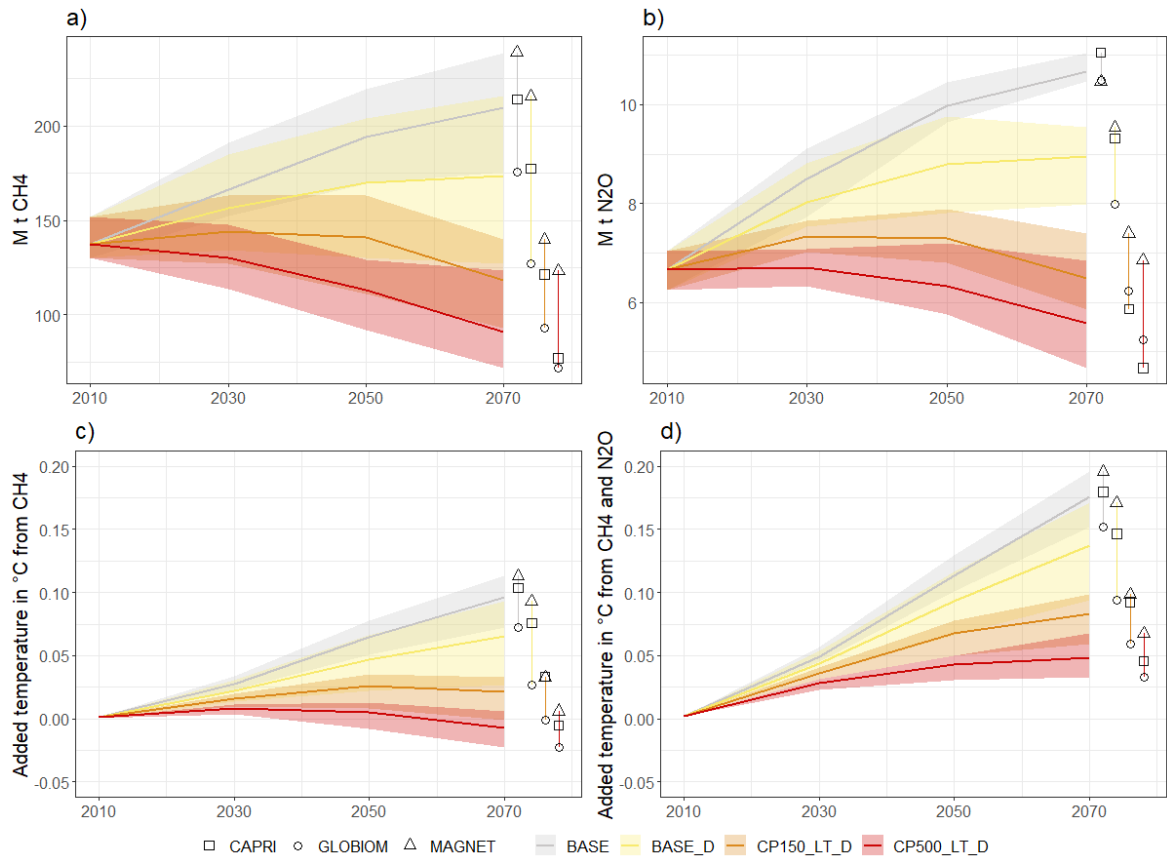

24

25 Note: The shading is the range (distribution across models for respective scenario) compared to the average (thick  
 26 middle line)

27

28 **Figure S4: Area, herd sizes, production and producer prices for crops, non-ruminants and ruminants aggregate products.**  
 29 *World totals for all scenarios, average model estimates, percentage change relative to the baseline: (a) non-dietary shift*  
 30 *scenarios and (b) dietary shift scenarios*

31 (a)

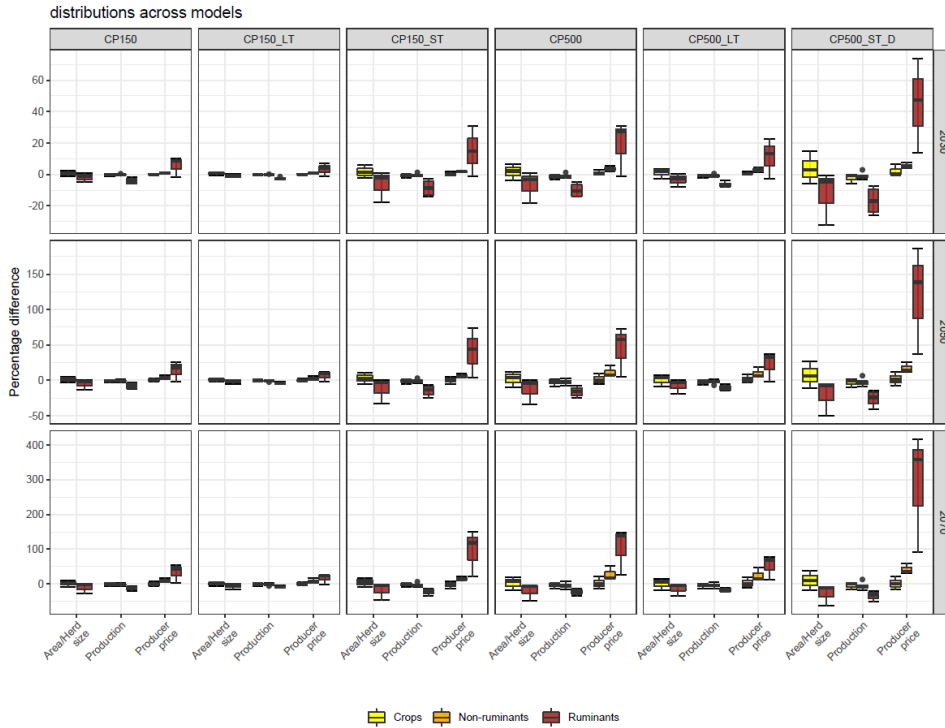

32

33 (b)

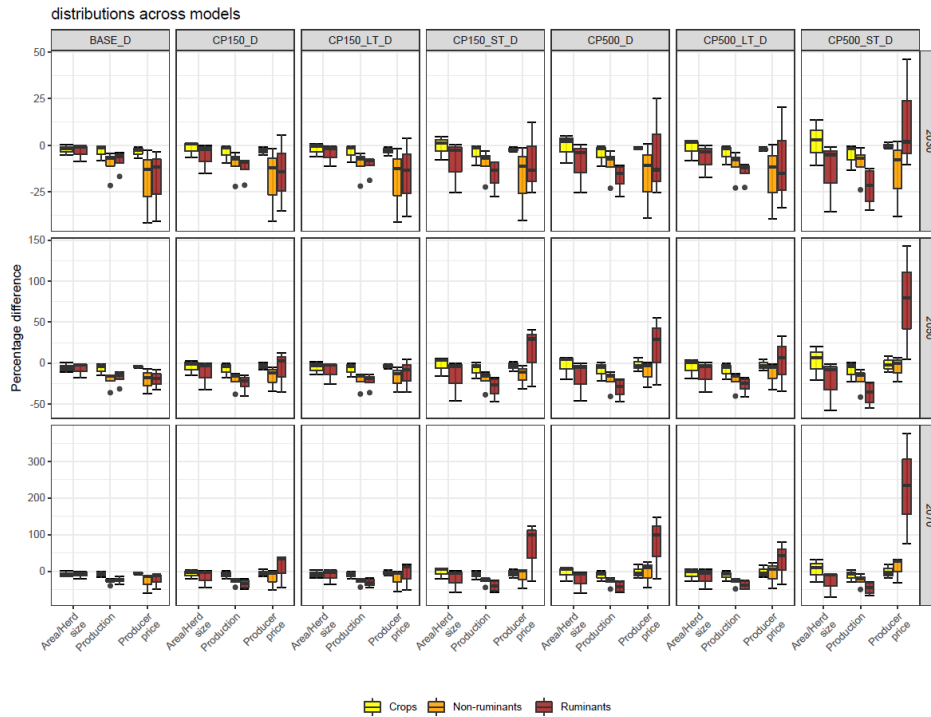

34

35 **Note:** non-ruminant herd sizes are not reported due to lack of detailed information by the models involved, which are  
 36 relying on slaughtering statistics.
